# Supplementary material for: Species Delimitation and Morphological Divergence in the Scorpion Centruroides vittatus (Say, 1821): Insights from Phylogeography
Source: PLoS One. 2013 Jul 5;8(7):e68282. doi: 10.1371/journal.pone.0068282 (PMC3702564; doi:10.1371/journal.pone.0068282)
Supplement: Table S3 — Divergence dates calculated through three BEAST constraints and MDIV. (XLSX) [file pone.0068282.s003.xlsx]

## Sheet: Sheet1
	Table S3. Divergence dates calculated through three BEAST constraints and MDIV.
	Population or clade divergences	Constraint @ NE populations (0.0060 mybp)	Constraint @ AgSp & NE populations (1.5 & 0.0060 mybp)	Unconstrained with 1% sequence divergence/106 years	MDIV
	G	0.0356	0.0231	0.0091
	H	0.0082	0.0046	0.0013
	F	0.0257	0.0163	0.0062
	I	0.0187	0.0115	0.0043
	K	0.0304	0.0191	0.0113
	J	0.0445	0.0278	0.0026
	L	0.0189	0.0115	0.0042
	M3	0.0069	0.0036	0.0009
	M2	0.0081	0.0045	0.0013
	M1	0.011	0.0059	0.0017	0.078
	D	0.0133	0.077	0.002
	A	0.0129	0.0074	0.0025
	C	0.0244	0.0152	0.0058
	B	0.0067	0.0036	0.0009
	E	0.0261	0.0166	0.0064
	B/C	0.0486	0.0308	0.0123	0.826
	(M4/M1)/M2	0.0124	0.0077	0.0025	0.0097
	H/G	0.0668	0.0421	0.0171	0.9096
	(H/G)/F	0.0789	0.0519	0.0211	1.0923
	C vittatus Root	0.1918	0.1279	0.052
	C_sc/C_infamatus	0.5799	0.3805	0.1598
	C_vittatus/C_gracilis	0.9333	0.5408	0.2115
	(M1/M2/M4)/TX26	0.0173	0.0109	0.0048
	(TX26/M1/M2/M4)/M3	0.0204	0.0129	0.0039
	M3 clade/L	0.0519	0.0337	0.0135
	E/(A,B,C,D)	0.077	0.0504	0.0204
	A/(B/C)	0.0567	0.0374	0.0161
	D/(A,B,C)	0.0616	0.04	0.0151
	I/(clade)	0.0938	0.0697	0.0257	1.6993
